# Supplementary material for: Surface Properties of CVD-Grown Graphene Transferred by Wet and Dry Transfer Processes
Source: MDPI journal article supplement (doi:10.3390/s22103944), 2022-05-23
Supplement: s1 [file s1]

*Supplementary Materials*

# Surface Properties of CVD-grown Graphene Transferred by Wet and Dry Transfer Processes

Min-Ah Yoon <sup>1,2,†</sup>, Chan Kim <sup>2,†</sup>, Jae-Hyun Kim <sup>1,2</sup>, Hak-Joo Lee <sup>3</sup> and Kwang-Seop Kim <sup>1,2,\*</sup>

<sup>1</sup> Division of Mechanical Engineering, University of Science & Technology (UST), 217 Gajeong-ro, Yuseong-gu, Daejeon 34113, Korea; mayoon@ust.ac.kr (M.-A.Y.); jaehkim@kimm.re.kr (J.-H.K.)

<sup>2</sup> Nano-Convergence Mechanical Systems Research Division, Korea Institute of Machinery & Materials (KIMM), 156 Gajeongbuk-ro, Yuseong-gu, Daejeon 34103, Korea; chankim@kimm.re.kr

<sup>3</sup> Center for Advanced Meta-Materials (CAMM), 156 Gajeongbuk-ro, Yuseong-gu, Daejeon 34103, Korea; hjlee@kimm.re.kr

\* Correspondence: kskim@kimm.re.kr

† These authors contributed equally to this work.

## 1. Roll-based dry transfer of graphene

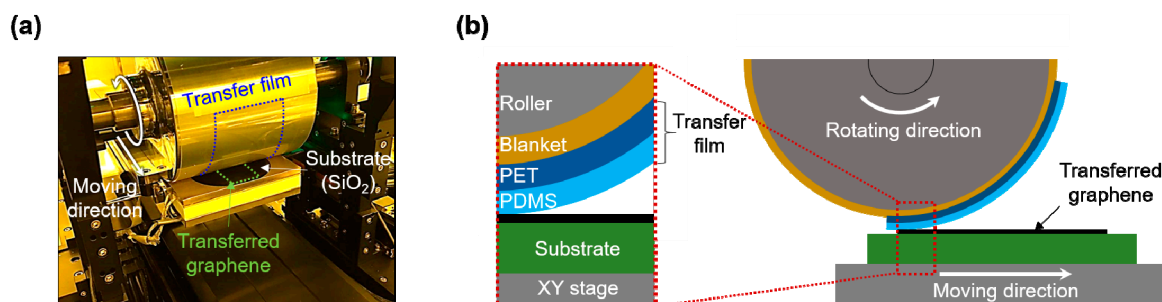

**Figure S1.** (a) A home built roll-to-plate (R2P) transfer machine for the roll-based dry transfer process of graphene. (b) Schematic diagram of the side of the TF in contact with graphene in the roll-based dry transfer process.

## 2. Raman results of wet- and dry-transferred graphene

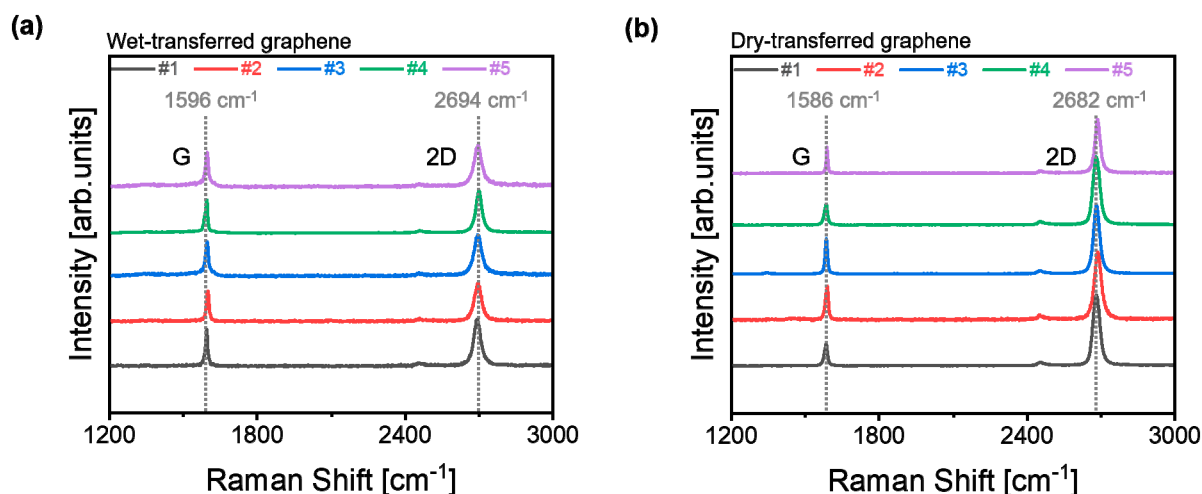

**Figure S2.** Raman spectra of 5 samples of (a) wet- and (b) dry-transferred graphene on SiO<sub>2</sub>. The dotted line with gray color represents averaged G and 2D peaks of the samples, respectively. The G and 2D peaks of wet-transferred graphene shifted slightly to  $\omega_G \sim 1596 \text{ cm}^{-1}$  and  $\omega_{2D} \sim 2694 \text{ cm}^{-1}$  from its intrinsic G- and 2D-bands ( $\omega_G \sim 1580 \text{ cm}^{-1}$  and  $\omega_{2D} \sim 2680 \text{ cm}^{-1}$ ). Dry-transferred graphene had exhibited similar G and 2D peaks with that of the intrinsic G- and 2D-bands.

Figure S2 shows the Raman spectra of the wet- and dry-transferred graphene on SiO<sub>2</sub>.  $I_{2D}/I_G$  of the wet-transferred graphene were varied from 1.17 to 1.29 and averaged to  $1.22 \pm 0.04$ , which was not significantly changed depending on sample (Fig. S2a). In the dry-transferred graphene (Fig. S2b),  $I_{2D}/I_G$  were changed from 1.8 to 3.2 depending on sample and averaged to  $2.38 \pm 0.6$ .  $I_{2D}/I_G$  of sample #1 and #4 in Fig. S2b were 3 and 3.2, respectively, and it indicates that the samples were slightly doped [1]. However, the difference between  $I_{2D}/I_G$  of the wet- and dry-transferred graphene is very clear which means that the transfer methods modified the surface properties of graphene.

## References

1. Casiraghi, C.; Pisana, S.; Novoselov, K. S.; Geim, A. K.; Ferrari, A. C. Raman fingerprint of charged impurities in graphene. *Appl. Phys. Lett.* **2007**, *91*, 233108.
